1 TITLE:

2 **Genomics of cellular proliferation under periodic stress**

3

4

5 AUTHORS:

6 Jérôme Salignon<sup>\*</sup>, Magali Richard<sup>\*</sup>, Etienne Fulcrand and Gaël Yvert<sup>#</sup>

7

8 AFFILIATIONS:

9 Laboratory of Biology and Modeling of the Cell, Ecole Normale Supérieure de Lyon, CNRS,  
10 Université Claude Bernard de Lyon, Université de Lyon, 69007 Lyon; France.

11

12 \*) these authors contributed equally to this work

13 #) corresponding author, [Gael.Yvert@ens-lyon.fr](mailto:Gael.Yvert@ens-lyon.fr)

14

15

16

17 ABSTRACT

18

19

20

21 Living systems control cell growth dynamically by processing information from their  
22 environment. Although responses to one environmental change have been intensively studied,  
23 little is known about how cells react to fluctuating conditions. Here we address this question  
24 at the genomic scale by measuring the relative proliferation rate (fitness) of 3,568 yeast gene  
25 deletion mutants in out-of-equilibrium conditions: periodic oscillations between two salinity  
26 conditions. Fitness and its genetic variance largely depended on the stress period.  
27 Surprisingly, dozens of mutants displayed pronounced hyperproliferation at short periods,  
28 identifying unexpected controllers of growth under fast dynamics. We validated the  
29 implication of the high-affinity cAMP phosphodiesterase and of a regulator of protein  
30 translocation to mitochondria in this control. The results illustrate how natural selection acts  
31 on mutations in a fluctuating environment, highlighting unsuspected genetic vulnerabilities to  
32 periodic stress in molecular processes that are conserved across all eukaryotes.

33

34 INTRODUCTION

35

36 Cells are dynamic systems that keep modifying themselves in response to variation of  
37 their environment. Interactions between internal dynamics of intracellular regulations and  
38 external dynamics of the environment can determine whether a cell dies, divides,  
39 differentiates or cooperates with other cells. For some systems, usually from model  
40 organisms, the molecules involved in signal transduction and cellular adaptation are largely  
41 known. Countless of them have been identified, often via genetic screens that isolated mutants  
42 with a defective response. How they act in motion, however, is unclear and it is difficult to  
43 predict which ones may be crucial upon certain frequencies of environmental fluctuations. In  
44 addition, since most screens were conducted in steady stressful conditions or after a single  
45 stress occurrence, molecules that are key to the dynamics may have been missed.

46

47 The control of cellular proliferation is essential to life and is therefore the focus of  
48 intense research, but its coupling to environmental dynamics remains poorly characterized. In  
49 addition, proliferation drives evolutionary selection, and the properties of natural selection in  
50 fluctuating environments are largely unknown. Although experimental data exist<sup>1,2</sup>, they are  
51 scarce and how mutations are selected in fluctuating conditions have mostly been studied  
52 under theoretical frameworks<sup>3-6</sup>. Repeated stimulations of a cellular response may have  
53 consequences on growth that largely differ from the consequences of a single stimulus. First,  
54 a small growth delay after the stimulus may be undetectable when applied only once, but can  
55 be highly significant when cumulated over multiple stimuli. Second, growth rate at a given  
56 time may depend on past environmental conditions that cells 'remember', and this memory  
57 can sometimes be transmitted to daughter cells<sup>7</sup>. These two features are well illustrated by the  
58 study of Razinkov *et al.*, who reported that protecting yeast GAL1 mRNA transcripts from

59 their glucose-mediated degradation resulted in a growth delay that was negligible after one  
60 galactose-to-glucose change but significant over multiple changes<sup>8</sup>. This effect is due to short-  
61 term 'memory' of galactose exposures, which is mediated by GAL1 transcripts that are  
62 produced during the galactose condition and later compete for translation with transcripts of  
63 the CLN3 cyclin during the glucose condition. Other memorization effects were observed on  
64 bacteria during repeated lactose to glucose transitions, this time due to both short-term  
65 memory conferred by persistent gene expression and long-term memory conferred by protein  
66 stability<sup>9</sup>.

67  
68 The yeast response to high concentrations of salt is one of the best studied mechanism  
69 of cellular adaptation. When extracellular salinity increases abruptly, cell-size immediately  
70 reduces and yeast triggers a large process of adaptation. The translation program<sup>10,11</sup> and  
71 turnover of mRNAs<sup>12</sup> are re-defined, calcium accumulates in the cytosol and activates the  
72 calcineurin pathway<sup>13</sup>, osmolarity sensors activate the High Osmolarity Glycerol MAPK  
73 pathway<sup>13,14</sup>, glycerol accumulates intracellularly as a harmless compensatory solute<sup>14</sup>, and  
74 membrane transporters extrude excessive ions<sup>13</sup>. Via this widespread adaptation, hundreds of  
75 genes are known to participate to growth control after a transition to high salt. What happens  
76 in the case of multiple osmolarity changes is less clear, but can be investigated by periodic  
77 stimulations of the adaptive response. For example, periodic transitions between 0 and 0.4M  
78 NaCl showed that MAPK activation was efficient and transient after each stress except in the  
79 range of ~8 min periods, where sustained activation of the response severely hampered cell  
80 growth<sup>15</sup>. How genes involved in salt tolerance contribute to cell growth in specific dynamic  
81 regimes is unknown. If a protein participates to the late phase of adaptation its mutation may  
82 have a strong impact at large periods and no impact at short ones. It is also possible that  
83 mutations affecting growth in dynamic conditions have been missed by long-term adaptation

84 screens. As mentioned above, a slight delay of the lag phase of adaptation may remain  
85 unnoticed after a single exposure, but its effect would likely cumulate over multiple  
86 exposures and be under strong selection in a periodic regime. Thus, even for a well-studied  
87 system such as yeast osmoadaptation, our molecular knowledge of cellular responses may be  
88 modest when dynamics are to be understood.

89

90         Although microfluidics enables powerful gene-centered investigations, its limited  
91 experimental throughput is not adapted to systematically search for genes involved in the  
92 dynamics of a cellular response. Identifying such genes can be done by applying stimulations  
93 to mutant cells periodically and testing if the effect of the mutation on proliferation is  
94 averaged over time. In other word, does fitness (proliferation rate relative to wild-type) of a  
95 mutant under periodic stress match the time-average of its fitness in each of the alternating  
96 condition? This problem of temporal heterogeneity is equivalent to the homogenization  
97 problem commonly encountered in physics for spatial heterogeneity, where microscopic  
98 heterogeneities in materials modify macroscopic properties such as their stiffness or  
99 conductivity<sup>16</sup>. If fitness is homogeneous (averaged over time), it implies that the effect of the  
100 mutation on the response occurs rapidly as compared to the frequency of environmental  
101 changes, that is does not affect the response lag phase and that the mutated gene is not  
102 involved in specific memory mechanisms. In contrast, fitness inhomogeneity (deviation from  
103 time-average expectation) is indicative of a role of the gene in the response dynamics.

104

105         In this study, we present a genomic screen that addresses this homogenization problem  
106 for thousands of gene deletion mutations in the context of the yeast salt response. The results  
107 reveal how selection of mutations can depend on environmental oscillations and identify

108 molecular processes that unsuspectedly become major controllers of proliferation at short  
109 periods of repeated stress.

110

111 RESULTS

112

113 **Genomic profiling of proliferation rates in steady and periodic salt stress**

114

115 We measured experimentally the contribution of thousands of yeast genes on  
116 proliferation in two steady conditions of different salinity, and in an environment that  
117 periodically oscillated between the two conditions. We used a collection of yeast mutants  
118 where ~5,000 non-essential genes have been individually deleted<sup>17</sup>. Since every mutant is  
119 barcoded by a synthetic DNA tag inserted in the genome, the relative abundance of each  
120 mutant in pooled cultures can be estimated by parallel sequencing of the barcodes (BAR-  
121 Seq)<sup>18,19</sup>. We set up an automated robotic platform to culture the pooled library by serial  
122 dilutions. Every 3 hours (average cell division time), populations of cells were transferred to a  
123 standard synthetic medium containing (S) or not (N) 0.2M NaCl. The culturing program was  
124 such that populations were either maintained in N, maintained in S, or exposed to alternating  
125 N and S conditions at periods of 6, 12, 18, 24 or 42 hours (Fig. 1A). Every regime was run in  
126 quadruplicates to account for biological and technical variability. Duration of the experiment  
127 was 3 days and populations were sampled every day. After data normalization and filtering  
128 we examined how relative proliferation rates compared between the periodic and the two  
129 steady environments.

130

131 **Protective genes have diverse contributions to proliferation under periodic stress**

132

133 We observed that genes involved in salt tolerance during steady conditions differed in  
134 the way they controlled growth under the periodic regime. As shown in Fig. 1B, differences  
135 were visible both among genes inhibiting growth and among genes promoting growth in high

136 salt. For example, NBP2 is a negative regulator of the HOG pathway<sup>20</sup> and MOT3 is a  
137 transcriptional regulator having diverse functions during osmotic stress<sup>21,22</sup>. Deletion of either  
138 of these genes improved tolerance to steady 0.2M NaCl (condition S). In the periodic regime,  
139 the relative growth of *mot3Δ* cells was similar to the steady condition N, as if transient  
140 exposures to the beneficial S condition had no positive effect. In contrast, the benefit of  
141 transient exposures was clearly visible for *nbp2Δ* cells. Differences were also apparent among  
142 protective genes. The Rim101 pathway has mostly been studied for its role during alkaline  
143 stress<sup>13</sup>, but it is also required for proper accumulation of the Ena1p transporter and efficient  
144 Na<sup>+</sup> extrusion upon salt stress<sup>23</sup>. Eight genes of the pathway were covered by our experiment.  
145 Not surprisingly, gene deletion decreased (resp. increased) proliferation in S (resp. N) for all  
146 positive regulators of the pathway (Fig. 1B and Fig1-supplement-1). This is consistent with  
147 the need of a functional pathway in S and the cost of maintaining it in N where it is not  
148 required. The response to periodic stimulation was, however, different between mutants  
149 (Fig1-supplement-1). Although RIM21, DFG16 and RIM9 all code for units of the  
150 transmembrane sensing complex<sup>24</sup>, proliferation was high for *rim21Δ* and *dfg16Δ* cells but not  
151 for *rim9Δ* cells. Similarly, Rim8 and Rim20 both mediate the activation of the Rim101p  
152 transcriptional repressor<sup>25,26</sup>; but *rim8Δ* and *rim101Δ* deletions increased proliferation under  
153 periodic stress whereas *rim20Δ* did not. This pathway was not the only example displaying  
154 such differences. Cells lacking either the HST1 or the HST3 NAD(+)-dependent histone  
155 deacetylase<sup>27</sup> grew poorly in S, but *hst1Δ* cells tolerated periodic stress better than *hst3Δ* cells  
156 (Fig. 1B).

157 Thus, gene deletion mutants of the same pathway or with similar fitness alterations in  
158 steady conditions can largely differ in their response to dynamic conditions.

159

160 **Widespread deviation from time-average fitness**



161

162 We then systematically asked, for each of the 3,568 gene deletion mutants, whether its  
163 fitness in the periodic regime matched the time-average of its fitness in conditions N and S.  
164 We both tested the statistical significance and quantified the deviation from the time-average  
165 expectation. For statistical inference, we exploited the full BAR-seq count data, including all  
166 replicated populations, by fitting to the data a generalized linear model that included a non-  
167 additive term associated to the fluctuations (see methods). The models obtained for the six  
168 genes discussed above are shown in Fig. 1C. Overall, we estimated that deviation from time-  
169 average fitness was significant for as many as ~2,000 genes, because it was significant for  
170 2,497 genes at a False-Discovery Rate (FDR) of 0.2 (Supplementary Table 1). At a stringent  
171 FDR of 0.0001, we listed 456 gene deletions for which fitness inhomogeneity was highly  
172 significant.

173

174 For quantification, we computed fitness values as in Qian et al.<sup>28</sup> (Fig. 1D) and plotted  
175 the observed fitness of all genes in the periodic environment as a function of their expected  
176 time-average fitness (Fig 1E). As for *nbp2Δ*, observed and expected values were often in good  
177 agreement. Highlighting the 456 significant genes revealed a surprising trend: for the majority  
178 of gene deletions expected to increase proliferation in the periodic regime (expected fitness >  
179 1), observed fitness was unexpectedly high. Gene annotations corresponding to higher-than-  
180 expected fitness were enriched for transcriptional regulators and for members of the  
181 cAMP/PKA pathway (Supplementary Table 2), which is consistent with cellular responses to  
182 environmental dynamics.

183

184 Although BAR-Seq can estimate thousands of fitness values in parallel, it has two  
185 important limitations: estimation by sequencing is indirect and the individual fitness of a

186 mutant is not distinguished from possible interactions with other mutants of the pool. We  
187 therefore sought to validate a subset of our observations by applying individual competition  
188 assays. Each mutant was co-cultured with a GFP-tagged wild-type strain, in N or S conditions  
189 or under the 6h-periodic regime, and the relative number of cells was counted by flow-  
190 cytometry<sup>28,29</sup>. Correlation between fitness estimates from BAR-Seq and individual assays  
191 was similar to previous reports<sup>28,30</sup> (Fig. 1F, Fig1-supplement-2), and the assays  
192 unambiguously validated the fitness inhomogeneity of several mutants including *rim21Δ* and  
193 *mot3Δ* (Fig. 1G).

194

### 195 **Impact of environmental dynamics on mutants proliferation**

196

197 If fitness inhomogeneity (deviation from time-average) is due to environmental  
198 dynamics, then it should be less pronounced at large periods of fluctuations. To see if this was  
199 the case, we computed for each mutant the ratio between its observed fitness in periodic stress  
200 and the time-average expectation from its fitness in the two steady conditions N and S.  
201 Fitness is inhomogeneous when this ratio deviates from 1. Plotting the distribution of this  
202 ratio at each period of fluctuation showed that, as expected, inhomogeneity was less and less  
203 pronounced as the period increased (Fig. 2A). We examined more closely three mutants  
204 displaying the highest inhomogeneity at the 6h period. Plotting their relative abundance in the  
205 different populations over the time of the experiment clearly showed that fitness of these  
206 mutants was unexpectedly extreme at short periods but less so at larger periods (Fig. 2B).

207

208 The fact that some mutants but not all were extremely fit to short-period fluctuations  
209 raised the possibility that the extent of differences in fitness between mutants may change  
210 with the period of environmental fluctuation. To see if this was the case, we computed the

211 genetic variance in fitness of each pooled population of mutants (see methods). Fitness  
212 variation between strains was more pronounced when populations were grown in S than in N,  
213 which agrees with the known effect of stress on fitness differences<sup>31</sup>. Remarkably, differences  
214 were even larger in fast-fluctuating periodic regimes, but not slow-fluctuating ones (Fig. 2A).  
215 This shows that environmental fluctuations can exert additional selective pressures at the level  
216 of the whole population (see discussion).

217

### 218 **Fitness during alternating selection**

219

220 Some gene deletions improved growth in one steady condition and penalized it in the  
221 other. This phenomenon is a special case of gene x environment interaction and is called  
222 antagonistic pleiotropy (AP)<sup>28</sup>. It is difficult to anticipate whether such mutations have a  
223 positive or negative impact on long-term growth in a periodic regime that alternates between  
224 favorable and unfavorable conditions, especially since fitness is not necessarily  
225 homogenized over time. We therefore studied these cases in more detail.

226

227 First, we examined if fitness inhomogeneity was related to the difference in fitness  
228 between the steady conditions (Fig. 3A). Interestingly, gene deletions conferring higher  
229 fitness in N than in S tended to be over-selected in the 6h-periodic regime, revealing a set of  
230 yeast genes that are costly in standard laboratory conditions as well as in the fast-fluctuating  
231 regime. We then searched for gene deletions that were advantageous in one steady condition  
232 and deleterious in the other (AP deletions). We found 48 gene deletions with statistically-  
233 significant AP between the N and S conditions (FDR = 0.01, Supplementary Table 3, see  
234 methods and Fig3-supplement-1). Interestingly, three of these genes coded for subunits of the  
235 chromatin-modifying Set1/COMPASS complex (Supplementary Table 2 and Fig3-

236 supplement-2). We inspected whether the direction of effect of these 48 deletions depended  
237 on the period of fluctuations (Fig. 3B). For 33 (resp. 6) AP deletions, the effect was positive  
238 (resp. negative) at all periods. For two mutations (*vhr1Δ* and *rim21Δ*), the direction of  
239 selection changed with the oscillating period. To visualize the periodicity-dependence of all  
240 AP deletions, we clustered them according to their fitness inhomogeneity (Fig. 3C-D). This  
241 highlighted 5 different behaviours: fluctuations could strongly favour proliferation of a  
242 mutant at all periods (e.g. *cin5Δ*) or mainly when they were fast (e.g. *oca1Δ*), they could  
243 mildly increase (e.g. *rim101Δ*) or decrease it (e.g. *csf1Δ*) or they could both increase and  
244 decrease it depending on their period (*vhr1Δ*). Thus, fitness during alternating selection was  
245 generally asymmetric in favour of positive selection, and its dependency to the alternating  
246 period differed between genes.

247

#### 248 **Environmental oscillations exacerbate the proliferation of some mutant cells**

249

250 We made the surprising observation that fitness during fluctuations could exceed or  
251 fall below the fitness observed in both steady conditions (Fig. 2B), a behaviour called  
252 '*transgressivity*' hereafter. By using the available replicate fitness values, we detected 55  
253 (resp. 23) gene deletions where fitness in the periodic environment was significantly stronger  
254 (resp. weaker) than the maximum (resp. minimum) of fitness in N and in S (Fig 4A,  
255 FDR=0.03, see methods). Importantly, transgressivity was observed not only from BAR-Seq  
256 but also when studying gene deletions one by one in competition assays, as shown for *pde2Δ*,  
257 *tom7Δ*, *trm1Δ* and *yjl135wΔ* (Fig. 4B-E). This reveals that environmental oscillations on short  
258 time scales can twist natural selection in favour of a subset of mutations on the long term.  
259 This may have important implications on the spectrum of mutations found in  
260 hyperproliferative clones that experienced repetitive stress (see discussion). It is also

261 remarkable that the gene deletions displaying this effect were associated to various cellular  
262 and molecular processes: cAMP/PKA (*pde2Δ*), protein import into mitochondria (*tom7Δ*),  
263 autophagy (*atg15Δ*), tRNA modification (*trm1Δ*), phosphatidylcholine hydrolysis (*srflΔ*) and  
264 MAPK signalling (*ssk1Δ*, *ssk2Δ*); and some of these molecular functions were not previously  
265 associated to salt stress.

266

267 **The high-affinity cAMP phosphodiesterase and Tom7p are necessary to limit**  
268 **hyperproliferation during periodic salt stress**

269

270 As mentioned above, several gene deletions impairing the cAMP/PKA pathway  
271 displayed inhomogeneous fitness (Supplementary Table 2). One of them, *pde2Δ*, had a  
272 particularly marked fitness transgressivity (Fig. 4B). To determine if this effect truly resulted  
273 from the loss of PDE2 activity, and not from secondary mutations or perturbed regulations of  
274 neighboring genes at the locus, we performed a complementation assay. Re-inserting a wild-  
275 type copy of the gene at another genomic locus reduced hyperproliferation and fully abolished  
276 fitness transgressivity (Fig. 4F). Thus, the observed effect of *pde2Δ* directly results from the  
277 loss of Pde2p, the high-affinity phosphodiesterase that converts cAMP to AMP<sup>32</sup>, showing  
278 that proper cAMP levels are needed to limit proliferation during repeated salinity changes.

279

280 Unexpectedly, we found that deletion of TOM7, which has so far not been associated  
281 to saline stress, also caused fitness transgressivity in the 6h-periodic environment (Fig. 4C).  
282 The Tom7p protein regulates the biogenesis dynamics of the Translocase of Outer Membrane  
283 (TOM) complex, the major entry gate of cytosolic proteins into mitochondria<sup>33</sup>, by affecting  
284 both the maturation of the central protein Tom40p and the later addition of Tom22p<sup>34,35</sup>. We  
285 observed that re-inserting a single copy of TOM7 in the homozygous diploid mutant was

286 enough to reduce hyperproliferation, although not to the levels of the wild-type diploid, and  
287 abolished fitness transgressivity (Fig. 4G). This suggests that proper dynamics of TOM  
288 assembly at the outer mitochondrial membrane are needed to limit proliferation during  
289 salinity fluctuations.

290

291

292

293

294

295

296

297 DISCUSSION

298

299 We quantified the contribution of 3,568 yeast genes to cell growth during periodic salt  
300 stress. This survey showed that for about 2,000 genes, fitness was not homogenized over  
301 time. In other words, the observed fitness of these genes in periodic stress did not match the  
302 time-average of the fitness in the two alternating conditions. This widespread and sometimes  
303 extreme time-inhomogeneity of the genetic control of cell proliferation has several important  
304 implications.

305

306 **Novel information is obtained when studying adaptation out of equilibrium.**

307

308 A large part of information about the properties of a responsive system is hidden at  
309 steady state. For example, a high protein level does not distinguish between fast production  
310 and slow degradation. For this reason, engineers working on control theory commonly study  
311 complex systems by applying periodic stimulations, a way to explore the system's behaviour  
312 out of equilibrium. Determining the frequencies at which a response is filtered or amplified is  
313 invaluable to predict the response to various types of stimulations. Such spectral analysis can  
314 sometimes reveal vulnerabilities, and it has also been applied to biological systems<sup>36</sup>. In the  
315 case of the yeast response to salt, Mitchell *et al.*<sup>15</sup> monitored activation of the HOG pathway  
316 upon periodic stimulations and reported a resonance phenomenon at a bandwidth that was  
317 consistent with the known kinetics of the pathway.

318 In the present study, mutant cells used in a genomic screen were repeatedly stimulated  
319 by a periodic stress. This revealed two features of the salt stress response that were not  
320 suspected. Numerous gene deletions exacerbate hyperproliferation at short fluctuation periods  
321 (Figs. 2A and 4A); and many of the genes concerned were not previously associated to salt

322 stress (e.g. TOM7, ATG15, SRF1, RPL15B, RRT12...). Thus, combining spectral analysis  
323 with genetic screening can reveal novel information on a well-known biological system.

324

### 325 **Gene x Environment interactions in dynamic conditions**

326

327 Interactions between genes and environmental factors (GxE) are omnipresent in  
328 genetics and constitute the driving force for the adaptation of populations. Because model  
329 organisms offer the possibility to study a given genotype in various environmental conditions,  
330 they have been very useful to delimit the properties and extent of GxE. However, this has  
331 usually been done by comparing steady environments. Our observation that the dynamics of  
332 the environment can twist the effect of a mutation beyond what is observed in steady  
333 conditions raises a fundamental question: is GxE predictable when environmental dynamics  
334 are known? Since we observed unpredictable inhomogeneities mostly at short periods of  
335 environmental oscillations, the answer to this question likely depends on the speed of  
336 environmental fluctuations. It will therefore be helpful to determine what is the critical period  
337 below which prediction is challenging. We showed that for a given system (yeast tolerance to  
338 salt) this limit differed between mutations. Future experiments that track the growth of  
339 specific mutants in microfluidic chambers may reveal the bandwidth of frequencies at which  
340 GxE interactions take place.

341

342 It is important to distinguish a periodic stress that is natural to an organism from a  
343 periodic stress that has never been experienced by the population (as considered here). In the  
344 first case, populations can evolve molecular clocks adapted to the stress period. This capacity  
345 is well known: nature is full of examples, and artificial clocks can be obtained by  
346 experimental evolution of micro-organisms<sup>37</sup>. In the case of periodic stress, an impressive



347 result was obtained on nematodes evolving under anoxia/normoxia transitions at each  
348 generation time. An adaptive mechanism emerged whereby hermaphrodites produced more  
349 glycogen during normoxia, at the expense of glycerol that they themselves needed, and  
350 transmitted this costly glycogen to their eggs in anticipation to their need of it in the  
351 upcoming anoxia condition<sup>38</sup>. In contrast, when a periodic stress is encountered for the first  
352 time, cells face a novel challenge. The dynamic properties of their stress response can then  
353 generate extreme phenotypes, such as hyperproliferation, as described here (Fig. 2B, Fig. 4A-  
354 D), or long-term growth arrest as described by others<sup>15</sup>.

355

### 356 **Natural selection in fluctuating environments.**

357

358 Because the traits we quantified were the relative rates of proliferation between  
359 different genotypes (fitness), our survey provides a genome-scale view of natural selection  
360 during periodic stress. The impact of environmental fluctuations is a fundamental and  
361 complex subject, since natural environments and population adaptation are both dynamic.  
362 Population parameters such as allele frequencies, mutation rate, population size, target size  
363 for beneficial mutations determine the dynamics of genetic adaptation and they themselves  
364 depend on environmental conditions and therefore on environmental dynamics. Theoretical  
365 studies have shown that this complex interaction between the dynamics of adaptation and  
366 those of the environment can affect selection<sup>3-5</sup>. One of these studies modeled the fate of a *de*  
367 *nov*o mutation appearing in a fixed-size population under a regime that fluctuated between  
368 two conditions, and causing a symmetric antagonistic effect between the two conditions<sup>5</sup>. The  
369 fluctuations were predicted to reduce the efficiency of selection in a way that, in addition to  
370 the fluctuating period, depended on two key factors i) the critical time necessary for a *de novo*  
371 mutation appearance and ii) the contrast in selection between the two conditions (equation [6])

372 of Cvijovic *et al.*<sup>5</sup>). As a result, the effect of the mutation significantly deviated from the time-  
373 average of its effect in each of the conditions. It is important to distinguish this  
374 inhomogeneity from the one we describe here. First, we did not measure the effect of *de novo*  
375 mutations but of mutations that were all present prior to the fluctuations. Although rare  
376 additional mutations could arise afterwards, their effect would only be significant in the case  
377 of dominance (because we used homozygous diploid strains), and convergence (we monitored  
378 several replicate populations in parallel), which is very unlikely for less than 30 generations.  
379 Second, the mutations we studied did not necessarily have a symmetric effect between the  
380 two conditions (see *srflA* in Fig. 2B for example). Conclusions of the two studies are  
381 therefore complementary: Cvijovic *et al.* reported a reduced selection on *de novo* mutations  
382 appearing during slow environmental fluctuations with seasonal drift, and we report here the  
383 emergence of strong positive selection on pre-existing mutations when novel, fast and strictly-  
384 periodic environmental fluctuations occur. These two types of inhomogeneity may both  
385 participate to the complexity of selection in natural environments.

386

387 Consistent with the inhomogeneities of fitness observed at the level of individual  
388 mutants, we also observed that the diversity of fitness among the pooled population of  
389 mutants was modified by environmental dynamics: the shorter the period of fluctuations, the  
390 stronger were the differences. This finding is important because, according to Fisher's  
391 theorem, genetic variation in fitness reflects the rate of population adaptation<sup>39,40</sup>. Our  
392 observations therefore directly couple two time scales: fast dynamics at the level of  
393 environmental fluctuations with long-term changes of the population. Note that this link has  
394 been studied experimentally since the 1960's: by evolving natural populations of *Drosophila*  
395 flies in either steady or fluctuating conditions, several studies showed that the genetic  
396 variance of fitness-related traits increased in the populations that evolved in fluctuating

397 regimes<sup>41-43</sup>. In our case, the genetic diversity (a large pool of *de novo* mutations) pre-existed  
398 the fluctuations and the observed elevated genetic variance in fitness corresponds to a large  
399 diversity of selection coefficients (fitness itself) acting on the mutations when the  
400 environment fluctuates. Thus, the dynamics of natural environments may increase not only  
401 the genetic variance of fitness-related traits but also the diversity of the selection coefficients  
402 acting on mutations. Both of these effects would then participate to the coupling between the  
403 short time scales of environmental fluctuations and the long time scales of population  
404 adaptation.

405

#### 406 **To sense, to memorize, or to anticipate ?**

407

408 A mutation may improve fitness under periodic stress in several ways. It may render  
409 individuals highly sensitive and reactive to environmental changes, so that the lag following  
410 each change is reduced. A mutation may also modify the ability of cells to 'remember' past  
411 conditions. Yeast cells are known to 'record' stress occurrence via molecular changes  
412 conferring long-term (epigenetic) memory associated with an improved response at later  
413 exposures<sup>44</sup>. In the case of salt stress, this process involves chromatin modifications mediated  
414 by the Set1/COMPASS complex<sup>45</sup>. Mutants of this complex displayed a systematic fitness  
415 pattern in our data. Removal of either one of five components (Swd1p, Spp1p, Sdc1p, Swd3p,  
416 Bre2p) decreased fitness in N, increased it in S, and increased it similarly in the periodic  
417 regime (Fig3-supplement-2). This could result from memory alterations that change the  
418 response dynamics in ways that are better suited to the periodic regime. Alternatively, it could  
419 result from a trade-off: the benefits of epigenetic memory also have a cost. The mechanism  
420 consumes energy (remodelling), chemicals (e.g. AdoMet), and modifies chromatin instead of  
421 letting it free to replicate. This may penalize growth of wild-type cells if they do this

422 repeatedly, as compared to mutants that do not. Stress memorization may also explain the  
423 fitness inhomogeneity of mutants impairing other chromatin modifying complexes, such as  
424 *rtt106Δ*, *set5Δ*, *swr1Δ*, *vps72Δ*, *hst3Δ* or *cac2Δ* (Supplementary Dataset). Finally, mutations  
425 may also diversify phenotypes between individual cells, or reduce the specialization of their  
426 phenotype, in anticipation of upcoming changes (bet-hedging)<sup>46,47</sup>. The relative efficiencies of  
427 these strategies and how they can evolve is a debated question<sup>3,6</sup>. Our screen offers new  
428 possibilities to investigate these adaptive strategies, for example by tracking the dynamics of  
429 growth of individual mutant cells in a controlled dynamic environment<sup>15,48</sup>. This may  
430 highlight genes that, when mutated, favour one strategy or the other.

431  
432 **The high-affinity cAMP phosphodiesterase constitutes a genetic vulnerability to**  
433 **environmental dynamics**

434  
435 One of the mutants unexpectedly fit to stress oscillations was *pde2Δ*, and this  
436 phenotype was complemented by ectopic re-insertion of a wild-type copy of the gene. The  
437 yeast genome encodes two phosphodiesterases, one of low affinity that shares homology with  
438 only a fraction of eukaryotes (Pde1p), and one of high affinity that belongs to a well-studied  
439 class of phosphodiesterases found in many species, including mammals (Pde2p)<sup>49</sup>. We note  
440 that our genomic data did not indicate any obvious fitness alteration of *pde1Δ* cells in  
441 fluctuating conditions (Supplementary Dataset). These two enzymes convert cAMP into  
442 AMP. By binding to the Bcy1p repressor of Protein Kinase A, cAMP activates this complex  
443 and thereby promotes proliferation in optimal growth conditions. This regulation is implicated  
444 in the response to various stresses, including high salt<sup>50,51</sup>. Negative regulators of the  
445 pathway, including *PDE2*, are recurrent targets for *de novo* mutations in yeast populations  
446 evolving in steady experimental conditions<sup>30</sup> and for natural standing variation affecting

447 proliferation under stressful conditions<sup>52</sup>. The fitness transgressivity of *pde2Δ* cells that we  
448 observed suggests that the positive selection of such mutations may be even stronger if  
449 environmental conditions fluctuate. In addition, the output of the cAMP/PKA pathway is  
450 most likely governed by its dynamic properties, since intracellular levels of cAMP oscillate,  
451 with consequences on the stress response nucleo-cytoplasmic oscillations of Msn2p<sup>53</sup>. The  
452 activity of Pde2p is itself modulated by PKA<sup>54</sup>, and this negative feedback is probably  
453 important for suitable dynamics<sup>55</sup>. Our results suggest that loss of this feedback confers a  
454 hyperproliferative advantage and that it therefore constitutes a genetic vulnerability during  
455 prolonged exposure to periodic stress.

456

#### 457 **Relevance to cancer**

458

459 Cancer is an evolutionary issue: hyperproliferative cells possessing tumorigenic  
460 somatic mutations accumulate in tissues and threaten the life of the body. This process is  
461 driven by two main factors: occurrence of these mutations (mutational input) which depends  
462 both on the mutation rate and on the genomic target size of tumorigenesis, and natural  
463 selection of somatic mutations among cells of the body. The effect of mutations on  
464 proliferation rates is not the sole process of selection (tumors also evolve more complex  
465 phenotypes such as invasiveness or angiogenesis) but it is central to it; and human tissues are  
466 paced by various dynamics. Sleep, food intake, hormonal cycles, exercise, breathing, heart  
467 beats, circadian clocks, walking steps and seasons constitute a long list of natural rhythms,  
468 mechanic and electromagnetic waves as well as periodic medicine intake constitute artificial  
469 ones. To our knowledge, the impact of these dynamics on the selection process of somatic  
470 mutations has not been studied. Our results on yeast suggest that it may be significant,  
471 because a transient episode of periodic stress may strongly reshape allele frequencies in a

472 population of mutant cells. If this happens in human tissues, it may affect the selection  
473 process of tumorigenic mutations. Also, if understood, such an effect could open medical  
474 perspectives to counter-select undesired mutations by applying beneficial environmental  
475 dynamics.

476 Remarkably, some of the yeast mutants displaying increased hyperproliferation during  
477 fast periodic stress correspond to molecular processes that are common to all eucaryotes  
478 (cAMP/PKA, autophagy, tRNA modifications, protein import in mitochondria). Our results  
479 suggest that the integrity of these pathways is threaten by environmental dynamics when  
480 wild-type yeast grow under periodic stress: if null mutations arise in the genes we identified,  
481 their high positive selection may cause their fixation. This raises the possibility that similar  
482 threats exist in humans: environmental dynamics may favour the loss of molecular functions  
483 that are important to limit proliferation. In particular, the RAS/cAMP/PKA pathway is altered  
484 in many cancers. Human cAMP-phosphodiesterases have been associated to tumor  
485 progression both positively (PDEs being overexpressed in tumors and PDE inhibitors limiting  
486 proliferation in several contexts<sup>56</sup>) and negatively (predisposing mutations being found in  
487 PDE8B<sup>57</sup> and PDE11A<sup>58-60</sup>). Given our observations, it is possible that the dynamics of the  
488 cellular environment may modulate the effect of these deregulations. More generally, now  
489 that barcoding techniques allow to track selection in cancer cell lines<sup>61</sup>, using them in a  
490 context of periodic stimulations may reveal unsuspected genetic factors.

491

492

493

494           METHODS

495

496   **Yeast deletion library and growth media.** The pooled homozygous diploid Yeast Deletion  
497 Library was purchased from Invitrogen (ref. 95401.H1Pool). In each strain, the coding  
498 sequence of one gene had been replaced by a KanMX4 cassette and two unique barcodes  
499 (uptag andowntag) flanked by universal primers<sup>62</sup>. Following delivery, the yeast pool was  
500 grown overnight in 100ml YPD medium, and 500  $\mu$ l aliquots ( $2.2 \times 10^8$  cells/ml) were stored  
501 in 25% glycerol at  $-80^\circ\text{C}$ . Medium N (Normal) was a synthetic complete medium made of 20  
502 g/L D-glucose, 6.7 g/L Yeast Nitrogen Base without amino-acids (Difco), 88.9 mg/L uracil,  
503 44.4 mg/L adenine, 177.8 mg/L leucine and all other amino-acids at 88.9 mg/L and 170  $\mu$ l/L  
504 NaOH 10N. Medium S (Salt) was made by adding 40 ml/L NaCl 5M to medium N (final  
505 concentration of 0.2M).

506

507   **Fluctuation experiment setup.** All steps of the fluctuation experiment were carried out in  
508 96-well sterile microplates using a Freedom EVO200 liquid handler (Tecan) equipped with a  
509 96-channel pipetting head (MCA), a high precision 8-channel pipetting arm (LiHa), a robotic  
510 manipulator arm (RoMa), a Sunrise plate reader (Tecan), a MOI-6 incubator (Tecan), and a  
511 vacuum station (Millipore). All robotic steps were programmed in Evoware v2.5.4.0 (Tecan).  
512 Each of 7 culture conditions (N, S, NS6, NS12, NS18, NS24, NS42) was applied on four  
513 independent populations. To reduce technical variability and population bottlenecks, each  
514 population was dispatched in four parallel microplates before each incubation step and these  
515 plates were combined into a single one after incubation. The size of each population was  
516 maintained over  $2.1 \times 10^7$  cells.

517

518 **Initialization of pooled-mutants cultures.** Four aliquots of the yeast deletion library were  
519 thawed, pooled and immediately diluted into 100 ml of fresh N medium. After mixing,  
520 samples of 220  $\mu$ l of the cell suspension were immediately distributed into 28 wells of each of  
521 four distinct microplates. This initiated a total of 112 populations of cells, each containing  
522 ~320 copies of each mutant strain on average. Plates were then incubated at 30°C for 6 hours  
523 with 270 rpm shaking.

524

525 **Fluctuations of pooled-mutants cultures.** Twice a day, a stock of source plates that  
526 contained sterile N or S fresh medium in the appropriate wells were prepared. Every 3 hours,  
527 the four microplates containing cells were removed from the incubator (30°C, 270 rpm) and  
528 cells were transferred to a single sterile plate having a 1.2  $\mu$ m-pore filter bottom (Millipore,  
529 MSBVS1210), media were removed by aspiration, four fresh source plates were extracted  
530 from the stock, 62  $\mu$ l of sterile media was pipeted from each of them and transferred to the  
531 filter plate, cells were resuspended by pipetting 220  $\mu$ l up and down, and 60  $\mu$ l of cell  
532 suspension were transferred to each of the 4 source plates which were then incubated at 30°C  
533 with 270 rpm for another 3 hours. Every 6 hours, cell density was monitored for one of the  
534 four replicate plates by OD<sub>600</sub> absorbance. Every 24 hours, 120  $\mu$ l of cultures from each  
535 replicate plate were sampled, pooled in a single microplate, centrifuged 10 minutes at 5000g  
536 and cell pellets were frozen at -80°C. Dilution rates of the populations were: 85% when the  
537 action was only to replace the media, 55% when it was to replace the media and to measure  
538 OD, and 32% when it was to replace the media, to measure OD and to store samples.

539 The experiment lasted 78 hours in total and generated samples from 28 independent  
540 populations at time points 6h (end of initialization), 30h, 54h and 78h.

541



542 **BAR-seq.** Frozen yeast pellets were resuspended in 200  $\mu$ l of a mix of 30 ml of Y1 Buffer  
543 (91.1 g of sorbitol in 300 ml H<sub>2</sub>O, 100 ml of 0.5 M EDTA, 0.5 ml of  $\beta$ -mercaptoethanol,  
544 completed with 500 mL of water), 60 units of zymolyase (MPBiomedicals, ref 8320921) and  
545 22.5  $\mu$ l of RNaseA at 34 mg/ml (Sigma ref R4642), vortexed and incubated for 1 hour at  
546 37°C for cell wall digestion. Genomic DNA (gDNA) was extracted by using the Macherey  
547 Nagel 96-well Nucleospin kit (ref 740741.24) following manufacturer's instructions. We  
548 designed and ordered from Eurogentec a set of 112 reverse primers of the form 5'-P5-X<sub>9</sub>-U2-  
549 3', where P5 (5'-  
550 AATGATACGGCGACCACCGAGATCTACACTCTTTCCCTACACGACGCTCTTCCGA  
551 TCT-3') allowed Illumina sequencing, X<sub>9</sub> was a custom index of 9 nucleotides allowing  
552 multiplexing via a Hamming code<sup>63</sup>, and U2 (5'-GTCGACCTGCAGCGTACG-3') matched  
553 a universal tag located downstream the uptag barcode of each mutant yeast strain. PCR  
554 amplification of the barcodes of each sample was done by using these reverse primers in  
555 combination with one forward primer of the form 5'-P7-U1-3', where P7 (5'-  
556 CAAGCAGAAGACGGCATAACGAGATGTGACTGGAGTTCAGACGTGTGCTCTTCCG  
557 ATCT-3') allowed Illumina sequencing and U1 (5'-GATGTCCACGAGGTCTCT-3')  
558 matched a universal tag located upstream the uptag barcode of each yeast mutant. Reagents  
559 used for one PCR reaction were: 18.3  $\mu$ l of water, 6  $\mu$ l of Buffer HF5X and 0.2  $\mu$ l of Phusion  
560 polymerase (ThermoFischer Scientific, ref F530-L), 2.5  $\mu$ l of dNTP 2.5 mM, 1  $\mu$ l of each  
561 primer at 333 nM and 1  $\mu$ l of gDNA at 300 to 400 ng/ $\mu$ l. Annealing temperature was 52°C,  
562 extension time 30 sec, and 30 cycles were performed. As observed previously, the PCR  
563 product migrated as two bands on agarose gels, which can be explained by heteroduplexes<sup>64</sup>.  
564 Both bands were extracted from the gel, purified and eluted in 30  $\mu$ l water. All 112  
565 amplification products were pooled together (10  $\mu$ l of each), gel-purified and eluted in a final

566 volume of 30  $\mu$ l water and sequenced by 50nt single reads on a Illumina HiSeq2500  
567 sequencer by ViroScan3D/ProfileXpert (Lyon, France).

568

569 **Data extraction, filtering and normalization.** Demultiplexing was done via an error-  
570 correction Hamming code as described previously<sup>63</sup>. Mapping (assignment of reads to yeast  
571 mutant barcodes) was done by allowing a maximal Levenstein distance of 1 between a read  
572 and any sequence in the corrected list of mutant barcodes of Smith et al.<sup>18</sup>. In total, 291  
573 million reads were mapped and used to build a raw 6,004 (mutants) by 112 (samples) table of  
574 counts. One sample was discarded because it was covered by less than 300,000 total counts  
575 and displayed mutants frequencies that were poorly correlated with their relevant replicates.  
576 Similarly, 2,436 mutants were covered by few (< 2,000) counts over all samples (including  
577 samples of another unrelated experiment that was sequenced in parallel) and were discarded,  
578 leaving a count table of 3,568 mutants by 111 samples for further analysis. This table was  
579 then normalized using the function *varianceStabilizingTransformation* from the DESeq2  
580 package<sup>65</sup> (version 1.8.1) with arguments `blind = FALSE` and `fitType = 'local'`.

581

582 **Fitness estimation.** We followed the method of Qian *et al.*<sup>28</sup> to estimate the fitness cost or  
583 gain ( $w$ ) of each mutant in each population. Eleven genes (Supplementary Table 4) were  
584 considered to be pseudogenes or genes with no effect on growth, and the data from the  
585 corresponding deletion mutants were combined and used as an artificial “wild-type”  
586 reference. For each mutant strain  $M$ ,  $w$  was calculated as :

$$w = \left( \frac{M_e/M_b}{WT_e/WT_b} \right)^{1/g}$$

587 with  $M_b$ ,  $M_e$ ,  $WT_b$ , and  $WT_e$  being the frequencies of strain  $M$  and artificial wild type strain  
588 ( $WT$ ) at the beginning ( $b$ ) or end ( $e$ ) of the experiment, and  $g$  the number of generations in

589 between.  $g$  was estimated from optical densities at 600nm of the entire population. It poorly  
590 differed between conditions and we fixed  $g = 24$  (8 generations per day, doubling time of 3h).

591

592 **Deviation from time-average fitness.** We analyzed fitness inhomogeneity by both  
593 quantifying it and testing against the null hypothesis of additivity. The quantification was  
594 done by computing  $wdev = \frac{w_{observed}}{w_{expected}}$ , where  $w_{observed}$  was the fitness of the mutant strain  
595 experimentally measured in the periodic environment and  $w_{expected}$  was the fitness expected  
596 given the fitness of the mutant strain in the two steady environments (N and S), calculated as

$$w_{expected} = w_N^{f_N} \cdot w_S^{f_S}$$

597 with  $f_N$  and  $f_S$  being the fraction of time spent in N and S media, respectively, during the  
598 course of the fluctuation experiment. Statistical inference was based on a Generalized Linear  
599 Model applied to the normalized count data. We assumed that the normalized counts of  
600 mutant  $i$  in condition  $c$  (N, S or periodic) at day  $d$  in replicate population  $r$  originated from a  
601 negative binomial distribution  $NB(\lambda_i, \alpha)$ , with :

$$\log(\lambda_i) = offset_{i,c} + \beta_{i,1} \cdot t_{c,d}^N + \beta_{i,2} \cdot t_{c,d}^S + \beta_{i,3} \cdot N_{c,d}^{changes} + \varepsilon_{i,c,d,r}$$

602 and  $offset_{i,c}$  being the median of normalized counts for condition  $c$  at day 0,  $t_{c,d}^N$  and  $t_{c,d}^S$   
603 being the amount of time spent in medium N and medium S at day  $d$ , respectively,  $N_{c,d}^{changes}$   
604 being the number of changes between the two media that took place between days 0 and  $d$ ,  
605 and  $\varepsilon$  being the residual error. The model was implemented in R using the function *glm.nb* of  
606 the MASS package (version 7.3-40).

607 If fitness is homogenized in a fluctuating environment, then it is insensitive to the number of  
608 changes and  $\beta_{i,3} = 0$ . Inhomogeneity can therefore be inferred from the statistical significance  
609 of the term  $N_{c,d}^{changes}$  of the model. The corresponding  $p$ -values were converted to  $q$ -values,  
610 using package *qvalue* version 2.0.0 in order to control the False Discovery Rate.

611

612 **Genetic variance in fitness** was computed for each condition as:

$$V_G = V_T - V_E$$

613 where

$$V_T = \frac{1}{3N} \sum_{i=1}^N \sum_{j=1}^3 (w_{i,j} - \bar{w})^2$$

614 was the total variance, and

$$V_E = \frac{1}{3N} \sum_{i=1}^N \sum_{j=1}^3 (w_{i,j} - \bar{w}_i)^2$$

615

616 was an estimate of the non-genetic variance in fitness, with  $N$  being the number of gene  
617 deletions,  $w_{i,j}$  the fitness of gene deletion  $i$  in replicate  $j$ ,  $\bar{w}_i$  the mean fitness of gene deletion  $i$   
618 and  $\bar{w}$  the global mean fitness. The 95% confidence intervals of  $V_G$  were computed from  
619 1,000 bootstrap samples (randomly picking mutant strains, with replacement).

620

621 **Antagonistic Pleiotropy.** We used the observed  $w_N$  and  $w_S$  values (fitness in the N and S  
622 steady conditions, respectively) of the deletion mutants to determine if a mutation was  
623 antagonistically pleiotropic (AP). Our experiment provided, for each mutant, 3 independent  
624 estimates of  $w_N$  and 4 independent estimates of  $w_S$  (replicate populations). For each mutant,  
625 we combined these estimates in 3 pairs of  $(w_N, w_S)$  values by randomly discarding one of the  
626 4 available  $w_S$  values, and these pairs were considered as 3 independent observations. We  
627 considered that an observation supported AP if the fitness values  $(w_N, w_S)$  showed (1) an  
628 advantage in one of the conditions and a disadvantage in the other, and (2) deviation from the  
629 distribution of observed values in all mutants, since most deletions are not supposed to be AP.  
630 Condition (1) corresponded to:  $(w_N > 1 \text{ AND } w_S < 1)$  OR  $(w_N < 1 \text{ AND } w_S > 1)$ . Condition

631 (2) was tested by fitting a bivariate Gaussian to all observed ( $w_N$ ,  $w_S$ ) pairs and labelling those  
632 falling 2 standard deviations away from the model (Fig3-supplement-1). A deletion was  
633 considered AP if all 3 observations supported AP, which was the case for 48 deletions. A  
634 permutation test (re-assigning observations to different deletions replicates) determined that  
635 less than one deletion (0.54 on average) was expected to have three observations supporting  
636 AP by chance only (Supplementary Table 3). For the selected 48 deletions, the magnitude of  
637 AP was computed as  $w_N / w_S$ . For each deletion, the direction of selection (Fig. 3C) in each  
638 condition was considered to be positive if  $\bar{w} - \sigma_w > 1$ , negative if  $\bar{w} + \sigma_w < 1$  and  
639 ambiguous otherwise, with  $\bar{w}$  and  $\sigma_w$  being the mean and standard deviation of fitness values  
640 across replicates, respectively. A mutation was classified as: 'unclear' if its direction of  
641 selection was ambiguous at four or five fluctuation periods, 'always positive' (resp. 'always  
642 negative') if all its unambiguous directions of selection were positive (resp. negative) and  
643 'period-dependent' if its direction differed between periods.

644

645 **Transgressive fitness.** We considered that a mutant had transgressive fitness if at least 3 of  
646 its 4 observed replicate measures of fitness in fluctuating conditions ( $w_{NS}$ ) were either all  
647 higher than  $\max(\bar{w}_N + \sigma_N, \bar{w}_S + \sigma_S)$  or all lower than  $\min(\bar{w}_N - \sigma_N, \bar{w}_S - \sigma_S)$ , where  $\bar{w}_N$   
648 (resp.  $\bar{w}_S$ ) was the mean fitness value in steady condition N and S, respectively, and  $\sigma_N$  (resp.  
649  $\sigma_S$ ) the corresponding standard deviation. A permutation test (re-assigning observations to  
650 random mutants) determined that less than three mutants (2.24 on average) were expected to  
651 display three replicates supporting transgressivity by chance only (Supplementary Table 5).

652

653 **Direct fitness measurement by flow cytometry: plasmids and strains.** Individual  
654 homozygous diploid knock-out strains were ordered from Euroscarf. Oligonucleotides and  
655 modified strains used in this study are listed in Supplementary Tables 6 and 7, respectively.

656 Wild-type strain BY4743 and individual mutants of interest were ordered from Euroscarf. We  
657 constructed a GFP-tagged wild-type strain (GY1738), and its non-GFP control (GY1735), by  
658 transforming BY4743 with plasmids pGY248 and HO-poly-KanMX4-HO<sup>66</sup>, respectively.  
659 Plasmid pGY248 was ordered from GeneCust who synthesized a Pact1-yEGFP BamHI  
660 fragment and cloned it into HO-poly-KanMX4-HO. Complemented strains were generated by  
661 cloning the wild-type copy of each gene of interest into a plasmid targeting integration at the  
662 *HO* locus. We first prepared a vector (pGY434) by removing the repeated *hisG* sequence of  
663 plasmid HO-*hisG*-URA3-*hisG*-poly-HO<sup>66</sup> by SmaI digestion and religation followed by ClaI  
664 digestion and religation. For *PDE2*, the wild-type (S288c) coding sequence with its 600bp  
665 upstream and 400bp downstream regions was synthesized by GeneCust and cloned in the  
666 BglII site of pGY434. The resulting plasmid (pGY453) was digested with NotI and  
667 transformed in strain GY1821 to give GY1929. For *TOM7*, we constructed plasmid pGY438  
668 by amplifying the HOL-URA3-HOR fragment of pGY434 with primers 1O21 and 1O22, and  
669 cloning it into pRS315<sup>67</sup> (linearized at NotI) by *in vivo* recombination. The wild-type copy  
670 of *TOM7* (coding sequence with its 465bp upstream and 813bp downstream regions) was  
671 PCR-amplified from strain BY4742 using primers 1O27 and 1O28 and co-transformed in  
672 BY4742 with PacI-PmeI fragment of pGY438 for *in vivo* recombination. The resulting  
673 plasmid (pGY442) was digested by NotI and the 4-kb fragment containing HO-URA3-  
674 *TOM7*-HO was gel-purified and transformed in GY1804 to obtain GY1921. Proper  
675 integration at the HO locus was verified by PCR. Since complementation was accompanied  
676 by the URA3 marker, which likely contributes to fitness, we competed strains GY1921 and  
677 GY1929 with a URA<sup>+</sup> wild-type strain (GY1961), which was obtained by transforming strain  
678 GY1738 with the PCR-amplified URA3 gene of BY4716 (with primers 1D11 and 1D12). The  
679 non-GFP control URA<sup>+</sup> wild-type strain GY1958 was obtained similarly.  
680

681 **Direct fitness measurement by flow cytometry: fluctuation cultures.** Each plate contained  
682 8 different mixed cultures (one per row) and 3 different conditions (N, S, NS6) with 4  
683 replicates each that were randomized (neighboring columns contained different conditions).  
684 Four plates were handled in parallel, which allowed us to test 32 different co-cultures per run,  
685 with at least one row per plate dedicated to controls (Wild-Type strain vs. itself or wild-type  
686 strain alone). Strains were streaked on G418-containing plates. Single colonies were used to  
687 inoculate 5 ml of N medium and were grown overnight at 30°C with 220 rpm shaking. The  
688 next day, concentration of each culture was adjusted to an OD<sub>600</sub> of 0.2. For co-cultures, 2 ml  
689 of wild-type cell suspension was mixed with 2 ml of mutant cell suspension, and 220 µl of  
690 this mix was transferred to the desired wells of a microplate. Plates were then incubated on the  
691 robotic platform at 30°C with 270 rpm for 4-5h. Fluctuations of the medium condition were  
692 also done by robotics: dilution (keeping 130µl of the 220µl cell suspension), filtration and re-  
693 fill every 3 hours, using a stock of fresh source plates prepared in advance. Twice a day, 90 µl  
694 of the cell suspension were fixed and processed for flow-cytometry. Fixation was done on the  
695 robotic platform, by washing cells twice with PBS 1X, resuspending them in PBS 1X +  
696 Paraformaldehyde 2% and incubating at room temperature for 8 min, washing with PBS 1X,  
697 resuspending cells in PBS + Glycine 0.1M, incubating at room temperature for 12 min, and  
698 finally washing cells with PBS 1X and re-suspending them in PBS 1X. Plates were then  
699 diluted (at 80-95%) in PBS 1X and stored at 4°C before being analyzed on a FacsCalibur flow  
700 cytometer (BD Biosciences). Acquisitions were stored on 10,000 cells at a mean rate of  
701 1,000 cells/s.

702

703 **Direct fitness measurement by flow cytometry: data analysis.** Raw .fcs files were analyzed  
704 using the *flowCore* package (version 1.34.3) from Bioconductor<sup>68</sup> and custom codes. Cells of  
705 homogeneous size were dynamically gated as follows: (i) removal of samples containing less

706 than 2000 cells, (ii) removal of events with saturated signals (FSC, SSC or FL1  $\geq 1023$  or  $\leq$   
707 0), (iii) computation of a density kernel of FSC,SSC values to define a perimeter of peak  
708 density containing 40% of events and (iv) cell gating using this perimeter, keeping  $>4,000$   
709 cells. In order to classify each cell as GFP<sup>+</sup> or GFP<sup>-</sup>, FL1 thresholds were determined  
710 automatically using the function *findValleys* from package *quantmod* (version 0.4-4). The  
711 relevance of these thresholds was then verified on control samples containing only one of the  
712 two strains (unimodal GFP<sup>+</sup> or GFP<sup>-</sup>). After classifying GFP<sup>+</sup> (i.e. WT) and GFP<sup>-</sup> (i.e.  
713 mutant) cells, fitness values were computed as  $w = \left( \frac{M_e/M_b}{WT_e/WT_b} \right)^{1/g}$ , with  $M_b$ ,  $M_e$ ,  $WT_b$ , and  
714  $WT_e$  being the frequencies of mutant strain  $M$  and wild type strain ( $WT$ ) at the beginning ( $b$ )  
715 or end ( $e$ ) of the experiment, and  $g=24$  the number of generations in between.  
716



717 REFERENCES

718

- 719 1. Stomp, M. *et al.* The timescale of phenotypic plasticity and its impact on competition  
720 in fluctuating environments. *Am Nat* **172**, 169–85 (2008).
- 721 2. Bleuven, C. & Landry, C. R. Molecular and cellular bases of adaptation to a changing  
722 environment in microorganisms. *Proc. R. Soc. B Biol. Sci.* **283**, 20161458 (2016).
- 723 3. Sæther, B.-E. & Engen, S. The concept of fitness in fluctuating environments. *Trends*  
724 *Ecol. Evol.* **30**, 273–281 (2015).
- 725 4. Svardal, H., Rueffler, C. & Hermisson, J. A general condition for adaptive genetic  
726 polymorphism in temporally and spatially heterogeneous environments. *Theor. Popul. Biol.*  
727 **99**, 76–97 (2015).
- 728 5. Cvijović, I., Good, B. H., Jerison, E. R. & Desai, M. M. Fate of a mutation in a  
729 fluctuating environment. *Proc. Natl. Acad. Sci.* **112**, E5021–E5028 (2015).
- 730 6. Kussell, E. & Leibler, S. Phenotypic diversity, population growth, and information in  
731 fluctuating environments. *Science* **309**, 2075–8 (2005).
- 732 7. Hilker, M. *et al.* Priming and memory of stress responses in organisms lacking a  
733 nervous system: Priming and memory of stress responses. *Biol. Rev.* **91**, 1118–1133 (2016).
- 734 8. Razinkov, I. A., Baumgartner, B. L., Bennett, M. R., Tsimring, L. S. & Hasty, J.  
735 Measuring Competitive Fitness in Dynamic Environments. *J. Phys. Chem. B* **117**, 13175–  
736 13181 (2013).
- 737 9. Lambert, G. & Kussell, E. Memory and fitness optimization of bacteria under  
738 fluctuating environments. *PLoS Genet* **10**, e1004556 (2014).
- 739 10. Uesono, Y. & Toh-e, A. Transient Inhibition of Translation Initiation by Osmotic  
740 Stress. *J. Biol. Chem.* **277**, 13848–13855 (2002).
- 741 11. Warringer, J., Hult, M., Regot, S., Posas, F. & Sunnerhagen, P. The HOG Pathway  
742 Dictates the Short-Term Translational Response after Hyperosmotic Shock. *Mol. Biol. Cell*  
743 **21**, 3080–3092 (2010).
- 744 12. Miller, C. *et al.* Dynamic transcriptome analysis measures rates of mRNA synthesis  
745 and decay in yeast. *Mol Syst Biol* **7**, 458 (2011).
- 746 13. Ariño, J., Ramos, J. & Sychrová, H. Alkali Metal Cation Transport and Homeostasis  
747 in Yeasts. *Microbiol. Mol. Biol. Rev.* **74**, 95–120 (2010).
- 748 14. Hohmann, S. Control of high osmolarity signalling in the yeast *Saccharomyces*  
749 *cerevisiae*. *FEBS Lett.* **583**, 4025–4029 (2009).
- 750 15. Mitchell, A., Wei, P. & Lim, W. A. Oscillatory stress stimulation uncovers an  
751 Achilles' heel of the yeast MAPK signaling network. *Science* **350**, 1379–1383 (2015).
- 752 16. Hassani, B. & Hinton, E. A review of homogenization and topology optimization I—  
753 homogenization theory for media with periodic structure. *Comput. Struct.* **69**, 707–717  
754 (1998).
- 755 17. Giaever, G. *et al.* Functional profiling of the *Saccharomyces cerevisiae* genome.  
756 *Nature* **418**, 387–91 (2002).
- 757 18. Smith, A. M. *et al.* Quantitative phenotyping via deep barcode sequencing. *Genome*  
758 *Res.* **19**, 1836–1842 (2009).
- 759 19. Robinson, D. G., Chen, W., Storey, J. D. & Gresham, D. Design and Analysis of Bar-  
760 seq Experiments. *G3 GenesGenomesGenetics* **4**, 11–18 (2014).
- 761 20. Mapes, J. & Ota, I. M. Nbp2 targets the Ptc1-type 2C Ser/Thr phosphatase to the HOG  
762 MAPK pathway. *EMBO J.* **23**, 302–311 (2004).
- 763 21. Montañés, F. M., Pascual-Ahuir, A. & Proft, M. Repression of ergosterol biosynthesis  
764 is essential for stress resistance and is mediated by the Hog1 MAP kinase and the Mot3 and

- 765 Rox1 transcription factors. *Mol. Microbiol.* **79**, 1008–1023 (2011).
- 766 22. Martínez-Montañés, F., Rienzo, A., Poveda-Huertes, D., Pascual-Ahuir, A. & Proft,  
767 M. Activator and Repressor Functions of the Mot3 Transcription Factor in the Osmostress  
768 Response of *Saccharomyces cerevisiae*. *Eukaryot. Cell* **12**, 636–647 (2013).
- 769 23. Marqués, M. C., Zamarbide-Forés, S., Pedelini, L., Llopis-Torregrosa, V. & Yenush,  
770 L. A functional Rim101 complex is required for proper accumulation of the Ena1 Na<sup>+</sup>-  
771 ATPase protein in response to salt stress in *Saccharomyces cerevisiae*. *FEMS Yeast Res.* **15**,  
772 (2015).
- 773 24. Obara, K., Yamamoto, H. & Kihara, A. Membrane Protein Rim21 Plays a Central  
774 Role in Sensing Ambient pH in *Saccharomyces cerevisiae*. *J. Biol. Chem.* **287**, 38473–38481  
775 (2012).
- 776 25. Herrador, A., Herranz, S., Lara, D. & Vincent, O. Recruitment of the ESCRT  
777 Machinery to a Putative Seven-Transmembrane-Domain Receptor Is Mediated by an  
778 Arrestin-Related Protein. *Mol. Cell. Biol.* **30**, 897–907 (2010).
- 779 26. Xu, W. & Mitchell, A. P. Yeast PalA/AIP1/Alix Homolog Rim20p Associates with a  
780 PEST-Like Region and Is Required for Its Proteolytic Cleavage. *J. Bacteriol.* **183**, 6917–6923  
781 (2001).
- 782 27. Brachmann, C. B. *et al.* The SIR2 gene family, conserved from bacteria to humans,  
783 functions in silencing, cell cycle progression, and chromosome stability. *Genes Dev.* **9**, 2888–  
784 2902 (1995).
- 785 28. Qian, W., Ma, D., Xiao, C., Wang, Z. & Zhang, J. The genomic landscape and  
786 evolutionary resolution of antagonistic pleiotropy in yeast. *Cell Rep* **2**, 1399–410 (2012).
- 787 29. Duveau, F. *et al.* Mapping Small Effect Mutations in *Saccharomyces cerevisiae*:  
788 Impacts of Experimental Design and Mutational Properties. *G3 GenesGenomesGenetics* **4**,  
789 1205–1216 (2014).
- 790 30. Venkataram, S. *et al.* Development of a Comprehensive Genotype-to-Fitness Map of  
791 Adaptation-Driving Mutations in Yeast. *Cell* **166**, 1585–1596.e22 (2016).
- 792 31. Martin, G. & Lenormand, T. The Fitness Effect of Mutations Across Environments: A  
793 Survey in Light of Fitness Landscape Models. *Evolution* **60**, 2413–2427 (2006).
- 794 32. Wilson, R. B. & Tatchell, K. SRA5 encodes the low-Km cyclic AMP  
795 phosphodiesterase of *Saccharomyces cerevisiae*. *Mol. Cell. Biol.* **8**, 505–510 (1988).
- 796 33. Neupert, W. & Herrmann, J. M. Translocation of Proteins into Mitochondria. *Annu.*  
797 *Rev. Biochem.* **76**, 723–749 (2007).
- 798 34. Yamano, K., Tanaka-Yamano, S. & Endo, T. Tom7 Regulates Mdm10-mediated  
799 Assembly of the Mitochondrial Import Channel Protein Tom40. *J. Biol. Chem.* **285**, 41222–  
800 41231 (2010).
- 801 35. Becker, T. *et al.* Biogenesis of Mitochondria: Dual Role of Tom7 in Modulating  
802 Assembly of the Preprotein Translocase of the Outer Membrane. *J. Mol. Biol.* **405**, 113–124  
803 (2011).
- 804 36. Ang, J., Ingalls, B. & McMillen, D. Probing the input-output behavior of biochemical  
805 and genetic systems system identification methods from control theory. *Methods Enzymol.*  
806 **487**, 279–317 (2011).
- 807 37. Wildenberg, G. A. & Murray, A. W. Evolving a 24-hr oscillator in budding yeast.  
808 *eLife* **3**, e04875 (2014).
- 809 38. Dey, S., Proulx, S. R. & Teotónio, H. Adaptation to Temporally Fluctuating  
810 Environments by the Evolution of Maternal Effects. *PLOS Biol* **14**, e1002388 (2016).
- 811 39. Fisher, R. A. *The genetical theory of natural selection.* (Dover, 1958).
- 812 40. Frank, S. A. & Slatkin, M. Fisher’s fundamental theorem of natural selection. *Trends*  
813 *Ecol. Evol.* **7**, 92–95 (1992).
- 814 41. Beardmore, J. A. Diurnal Temperature Fluctuation and Genetic Variance in

- 815 *Drosophila* Populations. *Nature* **189**, 162–163 (1961).
- 816 42. Mackay, T. F. C. Genetic variation in varying environments. (1979).
- 817 43. Verdonck, M. V. Adaptation to environmental heterogeneity in populations of  
818 *Drosophila melanogaster*. *Genet. Res.* **49**, 1 (1987).
- 819 44. Guan, Q., Haroon, S., Bravo, D. G., Will, J. L. & Gasch, A. P. Cellular Memory of  
820 Acquired Stress Resistance in *Saccharomyces cerevisiae*. *Genetics* **192**, 495–505 (2012).
- 821 45. D’Urso, A. *et al.* Set1/COMPASS and Mediator are repurposed to promote epigenetic  
822 transcriptional memory. *Elife* **5**, e16691 (2016).
- 823 46. Vogt, G. Stochastic developmental variation, an epigenetic source of phenotypic  
824 diversity with far-reaching biological consequences. *J. Biosci.* **40**, 159–204 (2015).
- 825 47. Grimbergen, A. J., Siebring, J., Solopova, A. & Kuipers, O. P. Microbial bet-hedging:  
826 the power of being different. *Curr. Opin. Microbiol.* **25**, 67–72 (2015).
- 827 48. Llamasi, A. *et al.* What Population Reveals about Individual Cell Identity: Single-Cell  
828 Parameter Estimation of Models of Gene Expression in Yeast. *PLOS Comput Biol* **12**,  
829 e1004706 (2016).
- 830 49. Ma, P., Wera, S., Van Dijck, P. & Thevelein, J. M. The PDE1-encoded low-affinity  
831 phosphodiesterase in the yeast *Saccharomyces cerevisiae* has a specific function in controlling  
832 agonist-induced cAMP signaling. *Mol. Biol. Cell* **10**, 91–104 (1999).
- 833 50. Norbeck, J. & Blomberg, A. The level of cAMP-dependent protein kinase A activity  
834 strongly affects osmotolerance and osmo-instigated gene expression changes in  
835 *Saccharomyces cerevisiae*. *Yeast* **16**, 121–137 (2000).
- 836 51. Park, J.-I., Grant, C. M. & Dawes, I. W. The high-affinity cAMP phosphodiesterase of  
837 *Saccharomyces cerevisiae* is the major determinant of cAMP levels in stationary phase:  
838 involvement of different branches of the Ras–cyclic AMP pathway in stress responses.  
839 *Biochem. Biophys. Res. Commun.* **327**, 311–319 (2005).
- 840 52. Parts, L. *et al.* Revealing the genetic structure of a trait by sequencing a population  
841 under selection. *Genome Res* **21**, 1131–8 (2011).
- 842 53. Garmendia-Torres, C., Goldbeter, A. & Jacquet, M. Nucleocytoplasmic Oscillations of  
843 the Yeast Transcription Factor Msn2: Evidence for Periodic PKA Activation. *Curr. Biol.* **17**,  
844 1044–1049 (2007).
- 845 54. Hu, Y., Liu, E., Bai, X. & Zhang, A. The localization and concentration of the PDE2-  
846 encoded high-affinity cAMP phosphodiesterase is regulated by cAMP-dependent protein  
847 kinase A in the yeast *Saccharomyces cerevisiae*. *FEMS Yeast Res.* **10**, 177–187 (2010).
- 848 55. Gonzales, K., Kayıkçı, Ö., Schaeffer, D. G. & Magwene, P. M. Modeling mutant  
849 phenotypes and oscillatory dynamics in the *Saccharomyces cerevisiae* cAMP-PKA pathway.  
850 *BMC Syst. Biol.* **7**, 1 (2013).
- 851 56. Ahmad, F. *et al.* Cyclic Nucleotide Phosphodiesterases: important signaling  
852 modulators and therapeutic targets. *Oral Dis.* **21**, e25–e50 (2015).
- 853 57. Rothenbuhler, A. *et al.* Identification of novel genetic variants in phosphodiesterase  
854 8B (PDE8B), a cAMP-specific phosphodiesterase highly expressed in the adrenal cortex, in a  
855 cohort of patients with adrenal tumours. *Clin. Endocrinol. (Oxf.)* **77**, 195–199 (2012).
- 856 58. Libé, R. *et al.* Phosphodiesterase 11A (PDE11A) and Genetic Predisposition to  
857 Adrenocortical Tumors. *Clin. Cancer Res.* **14**, 4016–4024 (2008).
- 858 59. Faucz, F. R. *et al.* Phosphodiesterase 11A (PDE11A) Genetic Variants May Increase  
859 Susceptibility to Prostatic Cancer. *J. Clin. Endocrinol. Metab.* **96**, E135–E140 (2011).
- 860 60. Horvath, A. *et al.* A genome-wide scan identifies mutations in the gene encoding  
861 phosphodiesterase 11A4 (PDE11A) in individuals with adrenocortical hyperplasia. *Nat.*  
862 *Genet.* **38**, 794–800 (2006).
- 863 61. Bhang, H. C. *et al.* Studying clonal dynamics in response to cancer therapy using  
864 high-complexity barcoding. *Nat. Med.* **21**, 440–448 (2015).

- 865 62. Winzeler, E. A. *et al.* Functional characterization of the *S. cerevisiae* genome by gene  
866 deletion and parallel analysis. *Science* **285**, 901–6 (1999).
- 867 63. Bystrykh, L. V. Generalized DNA Barcode Design Based on Hamming Codes. *PLoS*  
868 *ONE* **7**, e36852 (2012).
- 869 64. Pierce, S. E., Davis, R. W., Nislow, C. & Giaever, G. Genome-wide analysis of  
870 barcoded *Saccharomyces cerevisiae* gene-deletion mutants in pooled cultures. *Nat. Protoc.* **2**,  
871 2958–2974 (2007).
- 872 65. Love, M. I., Huber, W. & Anders, S. Moderated estimation of fold change and  
873 dispersion for RNA-seq data with DESeq2. *Genome Biol.* **15**, (2014).
- 874 66. Voth, W. P., Richards, J. D., Shaw, J. M. & Stillman, D. J. Yeast vectors for  
875 integration at the HO locus. *Nucleic Acids Res* **29**, E59-9 (2001).
- 876 67. Brachmann, C. B. *et al.* Designer deletion strains derived from *Saccharomyces*  
877 *cerevisiae* S288C: a useful set of strains and plasmids for PCR-mediated gene disruption and  
878 other applications. *Yeast* **14**, 115–32 (1998).
- 879 68. Hahne, F. *et al.* flowCore: a Bioconductor package for high throughput flow  
880 cytometry. *BMC Bioinformatics* **10**, 106 (2009).
- 881 69. Soares, L. M., Radman-Livaja, M., Lin, S. G., Rando, O. J. & Buratowski, S.  
882 Feedback Control of Set1 Protein Levels Is Important for Proper H3K4 Methylation Patterns.  
883 *Cell Rep.* **6**, 961–972 (2014).
- 884

885

886

## 887 ACKNOWLEDGEMENTS

888

889 We thank Julien Gagneur for suggestions on normalization and general linear models,  
890 Arnaud Bonnafox, Florent Chuffart, Pascal Hersen, Abderrahman Khila, Sébastien  
891 Lemaire, Serge Pelet and Alexandre Soulard for discussions, Julien Gagneur, Jun-Yi Leu,  
892 Stephen Proulx, Mark Siegal and Henrique Teotonio for critical reading of the manuscript,  
893 Audrey Barthelaix for initial tests on the robotic platform, Hélène Duplus-Bottin for technical  
894 help on strains constructions, David Stillman for plasmids, Sandrine Mouradian and SFR  
895 Biosciences Gerland-Lyon Sud (UMS3444/US8) for access to flow cytometers and technical  
896 assistance, BioSyL Federation and Ecofect Labex for inspiring scientific events, developers of  
897 R, Bioconductor and Ubuntu for their software. This work was supported by the European  
898 Research Council under the European Union's Seventh Framework Programme FP7/2007-  
899 2013 Grant Agreement n°281359 and by the Fondation ARC pour la recherche sur le cancer.

900 AUTHOR CONTRIBUTIONS

901

902 J.S. and M.R. set up automated cultures; J.S. performed the experiments, optimized  
903 automation and analyzed the data; M.R. designed multiplexing oligonucleotides, set up BAR-  
904 Seq libraries preparations and supervised J.S. for the genomic experiment; J.S, M.R., and E.F.  
905 constructed strains; J.S. and E.F. performed flow cytometry; J.S., M.R., and G.Y.  
906 implemented the GLM model, interpreted results and wrote the paper; G.Y. conceived,  
907 designed and supervised the study.

908

909

910 LEGENDS TO FIGURES

911

912 **Fig. 1. Genomic profiling of fitness in a periodic environment.** (A) Experimental

913 design. Populations of yeast deletion strains are cultured in media N (no salt), S (salt) and in

914 conditions alternating between N and S at various periods. Allele frequencies are determined

915 by BAR-seq and used to compute fitness (proliferation rate relative to wild-type) of each

916 mutant. (B) Time-course of mutant abundance in the population, shown for six mutants.

917 Relative abundance corresponds to the median of  $\log_2(y/y_0)$  values  $\pm$  *s.d.* (*n*=4 replicate

918 cultures, except for condition N at day 3: *n*=3), where *y* is the normalized number of reads,

919 and *y*<sub>0</sub> is *y* at day 0. Conditions: N (yellow), S (blue), 6h-periodic (NS6, hatching). (C)

920 Generalized linear models (*predicted value*  $\pm$  *s.e.*) fitted to the data shown in (B), colored by

921 condition: N (yellow); S (blue); NS6 predicted by the null model (grey) or predicted by the

922 complete model including inhomogeneity (red). \*\*\*,  $P < 10^{-8}$ . *n.s.*, non-significant. (D)

923 Fitness values (*w*) computed from the data of two mutants shown in (B). Bars, mean  $\pm$  *s.e.m.*,

924 *n* = 3 (N) or 4 (S, NS6) replicate cultures, colored according to culture condition. Grey dashed

925 line: expected fitness in case of additivity (geometric mean of fitness in N and S weighted by

926 the time spent in each medium). (E) Scatterplot of all mutants showing their observed fitness

927 under 6h-periodic fluctuations (*y*-axis, NS6 regime) and their expected fitness in case of

928 additivity (*x*-axis, weighted geometric mean of fitness in N and S). Deviation from the

929 diagonal reflects inhomogeneity. Red dots : 456 mutants with significant inhomogeneity

930 ( $FDR = 0.0001$ , see methods). (F) Correlation between fitness estimates (*w*). Each dot

931 corresponds to the median fitness of one mutant in one condition (N, S or NS6), measured

932 from pooled cultures (*x*-axis) or from individual assays (one mutant co-cultured with WT

933 cells, *y*-axis). Whole data: 52 mutants. *R*, Pearson coefficient; grey line,  $y = x$ ; red line, linear

934 regression. (G) Validation of inhomogeneity by cell counting. One graph shows the time-

935 course of mutant abundance when it was individually co-cultured with GFP-tagged wild-type  
936 cells, measured by flow-cytometry. Median values  $\pm$  *s.d.* ( $n=4$  replicate cultures). Conditions:  
937 N (yellow), S (blue), 6h-periodic (NS6, hatching).

938

939

940 **Fig. 2. Proliferative advantage depends on environmental dynamics.** (A) Violin  
941 plots showing the distribution of fitness inhomogeneity of 3,568 gene deletions at the  
942 indicated periods of environmental fluctuations. Traces and labels, mutants with extreme  
943 inhomogeneity at 6h-period. Top, number of gene deletions with significant inhomogeneity at  
944  $FDR = 0.0001$ . (B) Time-course of the abundance of mutants *cin5Δ*, *srf1Δ* and *yor029w* in the  
945 pool of all mutants, under different fluctuating regimes, quantified by BAR-Seq. Median  
946 values  $\pm$  *s.d.* ( $n=4$  replicate cultures, except for the N condition at day 3:  $n=3$ ). (C) The  
947 genetic variance in fitness of the pooled population of mutants was computed for each  
948 condition. Bars: 95% CI bootstrap intervals.

949

950

951 **Fig. 3. Long-term effect on growth during alternating selection.** (A) Fitness  
952 inhomogeneity *vs.* antagonism between environments. Blue dots, 48 gene deletions with  
953 significant antagonistic pleiotropy (AP) between N and S ( $FDR = 0.01$ ). (B) AP gene  
954 deletions were classified according to their direction of effect on growth, positive meaning  
955 advantageous. 'Always' means 'at all periods of fluctuations'. (C) Hierarchical clustering of  
956 AP deletions according to fitness inhomogeneity. (D) Fitness values of five mutants  
957 representative of the clusters shown in C. Bars: mean  $\pm$  *s.e.m.*,  $n = 3$  (N) or 4 (others) replicate  
958 cultures.

959

960           **Fig. 4. Extreme proliferation rates emerging from environmental oscillations. (A)**  
961 Scatterplot of all mutants showing their observed fitness in the 6h-periodic regime (NS6)  
962 relative to their fitness in N (*x*-axis) and S (*y*-axis). Violet, 78 mutants with significant  
963 transgressivity ( $FDR = 0.03$ ). **(B-E)** Time-course of mutant abundance in the pool of all  
964 mutants (BAR-Seq, left, as in Fig. 1B) or when the mutant was individually co-cultured with  
965 GFP-tagged wild-type cells (Flow-cytometry, right, as in Fig. 1G). Median values  $\pm s.d.$  ( $n=4$   
966 replicate cultures, except for BAR-Seq N condition at day 3:  $n=3$ ). Conditions: N (yellow), S  
967 (blue), NS6 (hatching). **(F-G)** Complementation assays. Diploid homozygous deletion  
968 mutants for *pde2* and *tom7* (strains GY1821 and GY1804, respectively) were complemented  
969 by integration of the wild-type gene at the *HO* locus (strains GY1929 and GY1921,  
970 respectively). Strains were co-cultured for 24h with GFP-tagged wild-type cells (strain  
971 GY1961) and relative fitness was measured by flow cytometry. Conditions: N (blue), S'  
972 (0.4M NaCl; orange) and 6h-periodic fluctuations between N and S' (hatching). Bars, mean  
973 fitness  $\pm s.e.m.$  ( $n=3$  replicate cultures).  
974



975 LIST OF SUPPLEMENTARY MATERIALS:

976

977 **Figure1-figure-supplement 1. BAR-seq fitness profile of mutants of the Rim101**  
978 **pathway.** (A) For mutants of the Rim101 pathway available in our data is shown their time-  
979 course abundance (left) and their fitted Generalized linear models (right), as in Figure 1. (B)  
980 Schematic representation of the pathway with colors corresponding to the level of fitness  
981 inhomogeneity of each member.

982

983 **Figure1-figure-supplement 2.** Time-course of mutant abundance, for mutants  
984 analyzed by BAR-Seq and individual competition assays.

985

986 **Figure3-figure-supplement 1. Detection of Antagonistic Pleiotropy.** Every dot  
987 corresponds to one mutant. Coordinates correspond to median fitness values of replicate  
988 populations grown in N ( $n=3$ ) or S ( $n=4$ ) condition. Oblique line:  $y=x$ . Red, AP mutants.

989

990 **Figure3-figure-supplement 2. BAR-seq fitness profile of mutants of the**  
991 **Set1/COMPASS complex.** (A) For each mutant of the complex available in our data is  
992 shown their time-course abundance (left) and their fitted Generalized Linear Model (right), as  
993 in Figure 1. (B) Schematic representation of the Compass complex (based on Soares *et al.*<sup>69</sup>)  
994 with colors corresponding to the level of fitness inhomogeneity of each member of the  
995 complex.

996

997

998

999

1000           **Supplementary Table 1.** Number of deletion mutants having significant fitness  
1001 inhomogeneity in the 6h-periodic regime, based on Generalized Linear Model.

1002

1003           **Supplementary Table 2.** Gene Ontology analysis.

1004

1005           **Supplementary Table 3.** Number of Antagonistic Pleiotropic mutants detected at  
1006 various stringency.

1007

1008           **Supplementary Table 4.** Deletions of genes and pseudogenes used to infer Wild-  
1009 Type fitness.

1010

1011           **Supplementary Table 5.** Number of mutants showing transgressive fitness at 6h-  
1012 period fluctuations.

1013

1014           **Supplementary Table 6.** DNA primers used in this study.

1015

1016           **Supplementary Table 7.** Yeast strains used in this study.

1017

1018           **Supplementary Dataset.** Full genomic dataset. See README.txt file for  
1019 documentation.

1020

1021

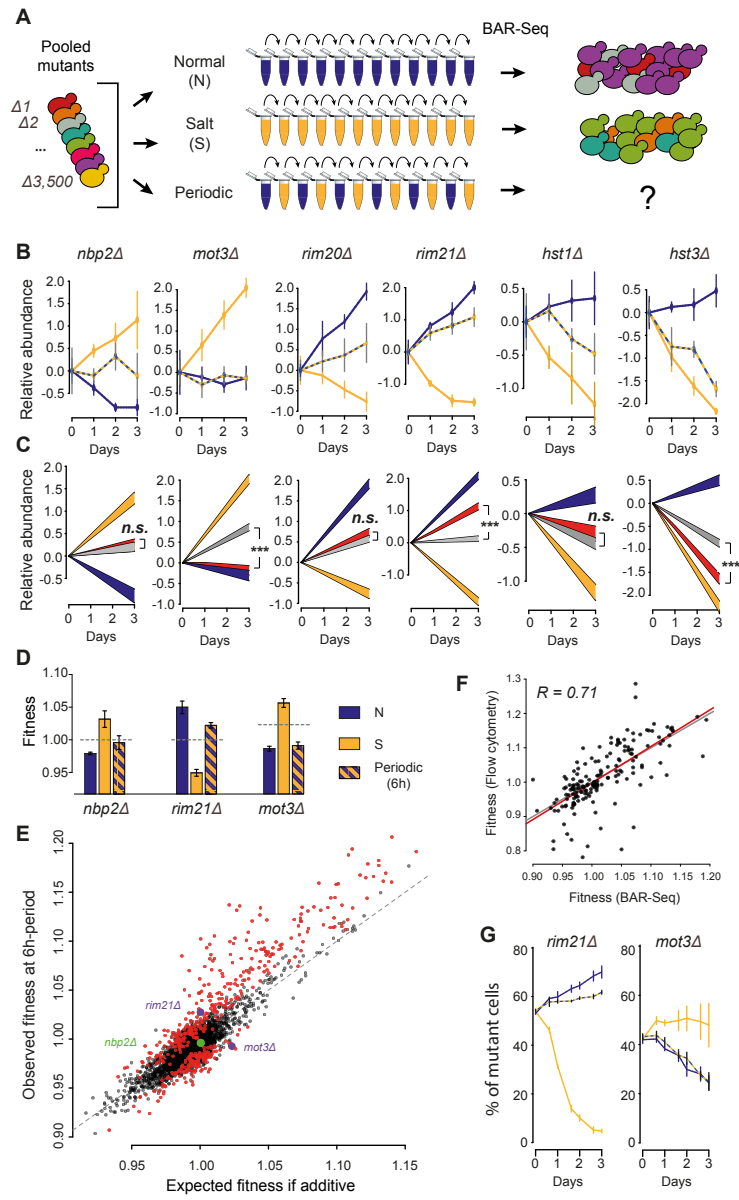

Figure 1

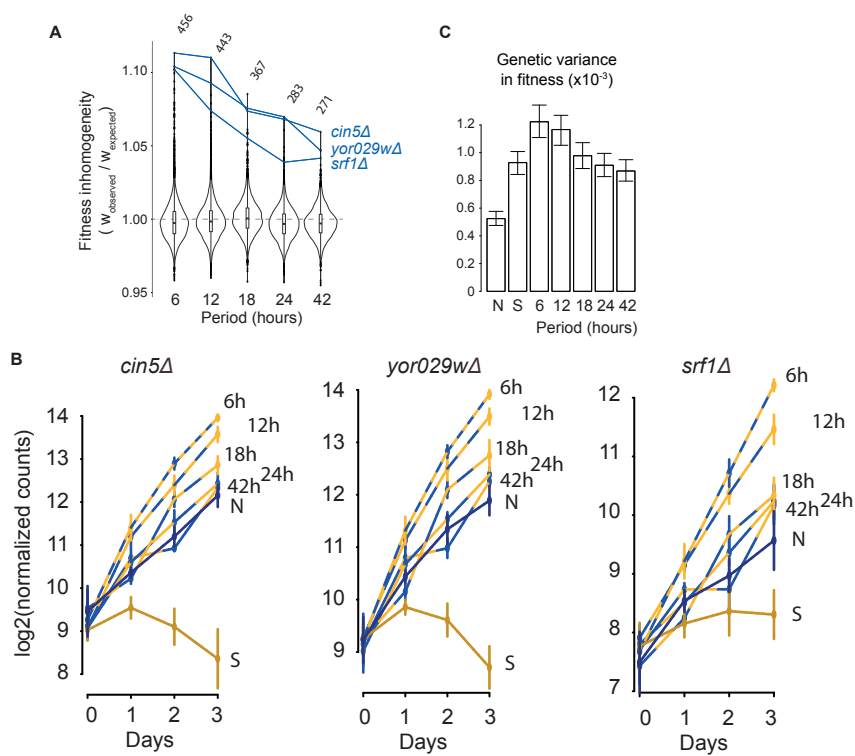

Figure 2

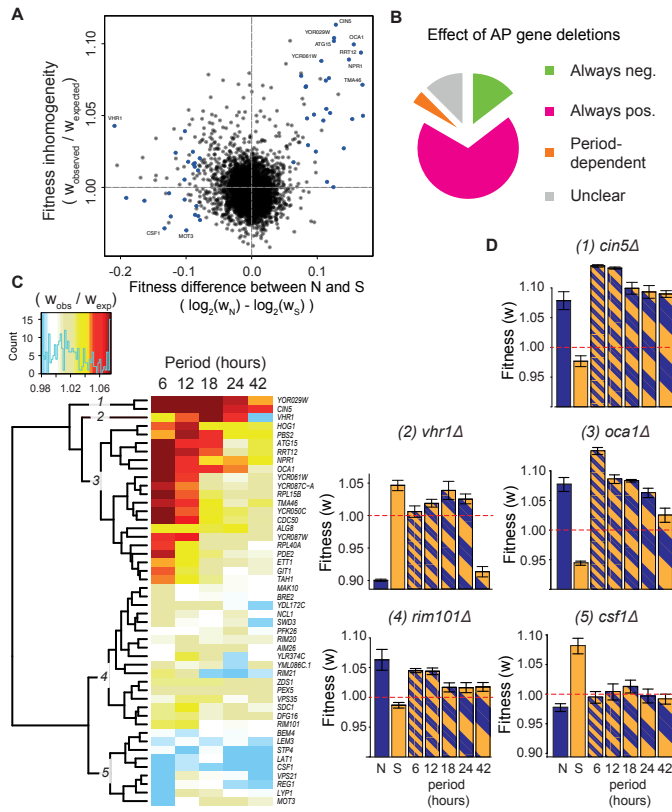

Figure 3

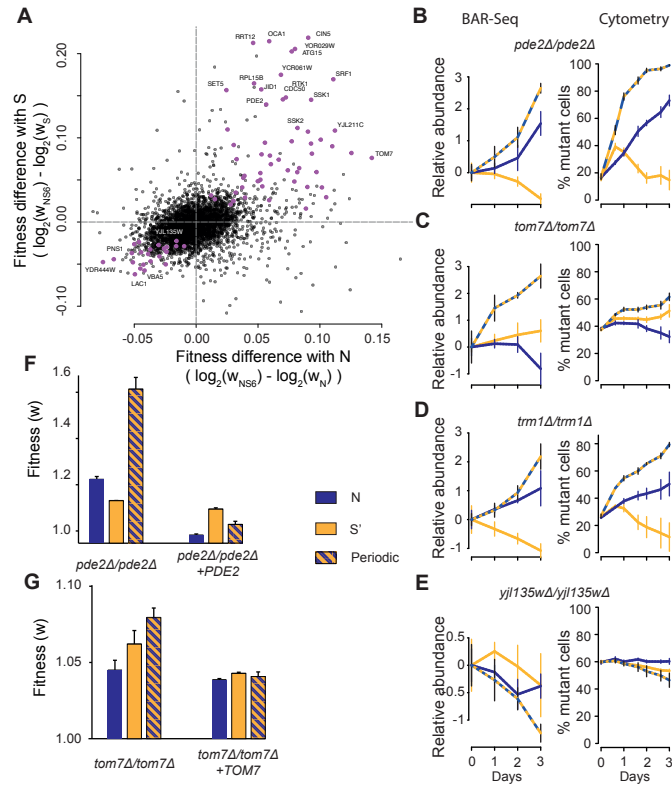

Figure 4
